# Supplementary material
Source: MDPI journal article supplement (https://www.mdpi.com/2304-6740/9/2/15)
Supplement: s1 [file s1]

# Supplementary Materials: Accessing Low-Valent Titanium CCC-NHC Complexes: Toward Nitrogen Fixation

Sriloy Dey and T. Keith Hollis \*

Figure S1: Stacked plot of the  $^1\text{H}$  NMR spectra for reoxidation of intermediate **3**. A:  $^1\text{H}$  NMR spectrum of intermediate **3**. B:  $^1\text{H}$  NMR spectrum of intermediate **3** after reoxidation. C:  $^1\text{H}$  NMR spectrum of **2** for reference.

Figure S2: Stacked plot of the  $^1\text{H}$  NMR spectra for reduction of **1** with Mg-metal followed by reoxidation with  $\text{PhICl}_2$  in no-D THF. A:  $^1\text{H}$  NMR spectrum for no-D THF (locked with  $\text{C}_6\text{D}_6$ ). B:  $^1\text{H}$  NMR spectrum for **1**. C:  $^1\text{H}$  NMR spectrum after reduction of **1** to intermediate **3**. D:  $^1\text{H}$  NMR spectrum after reoxidation of intermediate **3** with  $\text{PhICl}_2$ .

Figure S3:  $^1\text{H}$  NMR spectrum after reoxidation of intermediate **3** with  $\text{PhICl}_2$ . Figure S4: Stacked plot of the relevant zoomed portions of  $^1\text{H}$  NMR spectra for reduction of **1** with Mg-metal followed by reoxidation with  $\text{PhICl}_2$  in no-D THF. A:  $^1\text{H}$  NMR spectrum for no-D THF (locked with  $\text{C}_6\text{D}_6$ ). B:  $^1\text{H}$  NMR spectrum for **1**. C:  $^1\text{H}$  NMR spectrum after reduction of **1** to intermediate **3**. D:  $^1\text{H}$  NMR spectrum after reoxidation of intermediate **3** with  $\text{PhICl}_2$ .

Figure S5: Stacked plot of the  $^1\text{H}$  NMR spectra for reduction of **1** with  $\text{KC}_8$  followed by reoxidation with  $\text{PhICl}_2$  in no-D THF. A:  $^1\text{H}$  NMR spectrum for no-D THF (locked with  $\text{C}_6\text{D}_6$ ). B:  $^1\text{H}$  NMR spectrum for **1**. C:  $^1\text{H}$  NMR spectrum after reduction of **1** to intermediate **3**. D:  $^1\text{H}$  NMR spectrum after reoxidation of intermediate **3** with  $\text{PhICl}_2$ .

Figure S6: Stacked plot of the relevant zoomed portions of  $^1\text{H}$  NMR spectra for reduction of **1** with  $\text{KC}_8$  followed by reoxidation with  $\text{PhICl}_2$  in no-D THF. A:  $^1\text{H}$  NMR spectrum for no-D THF (locked with  $\text{C}_6\text{D}_6$ ). B:  $^1\text{H}$  NMR spectrum for **1**. C:  $^1\text{H}$  NMR spectrum after reduction of **1** to intermediate **3**. D:  $^1\text{H}$  NMR spectrum after reoxidation of intermediate **3** with  $\text{PhICl}_2$ .

Figure S7: Stacked plot of the  $^1\text{H}$  NMR spectra for reduction of **2** with  $\text{KC}_8$  followed by reoxidation with  $\text{PhICl}_2$  in no-D THF. A:  $^1\text{H}$  NMR spectrum for no-D THF (locked with  $\text{C}_6\text{D}_6$ ). B:  $^1\text{H}$  NMR spectrum for **2**. C:  $^1\text{H}$  NMR spectrum after reduction of **2** to intermediate **3'**. D:  $^1\text{H}$  NMR spectrum after reoxidation of intermediate **3'** with  $\text{PhICl}_2$ .

Figure S8: Stacked plot of the relevant zoomed portions of  $^1\text{H}$  NMR spectra for reduction of **2** with  $\text{KC}_8$  followed by reoxidation with  $\text{PhICl}_2$  in no-D THF. A:  $^1\text{H}$  NMR spectrum for no-D THF (locked with  $\text{C}_6\text{D}_6$ ). B:  $^1\text{H}$  NMR spectrum for **2**. C:  $^1\text{H}$  NMR spectrum after reduction of **2** to intermediate **3'**. D:  $^1\text{H}$  NMR spectrum after reoxidation of intermediate **3'** with  $\text{PhICl}_2$ .

Figure S9: Stacked plot of the  $^1\text{H}$  NMR spectra for reduction of **2** with Mg-metal followed by reoxidation with  $\text{PhICl}_2$  in no-D THF. A:  $^1\text{H}$  NMR spectrum for no-D THF (locked with  $\text{C}_6\text{D}_6$ ). B:  $^1\text{H}$  NMR spectrum for **2**. C:  $^1\text{H}$  NMR spectrum after reduction of **2** to intermediate **3'**. D:  $^1\text{H}$  NMR spectrum after reoxidation of intermediate **3'** with  $\text{PhICl}_2$ . Figure S10: Pictures of NMR tubes from reduction of **2** with 1, 2 and 4 equivalents of  $\text{KC}_8$  respectively.

Figure S11: Stacked plot of the  $^1\text{H}$  NMR spectra for reduction of **2** with  $\text{KC}_8$  followed by reoxidation with  $\text{PhICl}_2$  in no-D THF. A:  $^1\text{H}$  NMR spectrum for no-D THF (locked with  $\text{C}_6\text{D}_6$ ). B:  $^1\text{H}$  NMR spectrum for **2**. C:  $^1\text{H}$  NMR spectrum after reduction of **2** to intermediate **3'**. D:  $^1\text{H}$  NMR spectrum after reoxidation of intermediate **3'** with  $\text{PhICl}_2$ .

Figure S12: Stacked plot of the  $^1\text{H}$  NMR spectra for reduction of **2** with  $\text{KC}_8$  followed by bubbling with CO in no-D THF. A:  $^1\text{H}$  NMR spectrum for no-D THF (locked with  $\text{C}_6\text{D}_6$ ). B:  $^1\text{H}$  NMR spectrum for **2**. C:  $^1\text{H}$  NMR spectrum after reduction of **2** to intermediate **3'**. D:  $^1\text{H}$  NMR spectrum after **3'** was bubbled with CO.

Figure S13: Stacked plot of the relevant zoomed portions of  $^1\text{H}$  NMR spectra for reduction of **2** with  $\text{KC}_8$  followed by bubbling with CO in no-D THF. A:  $^1\text{H}$  NMR spectrum for no-D THF (locked with  $\text{C}_6\text{D}_6$ ). B:  $^1\text{H}$  NMR spectrum for **2**. C:  $^1\text{H}$  NMR spectrum after reduction of **2** to intermediate **3'**. D:  $^1\text{H}$  NMR spectrum after **3'** was bubbled with CO.

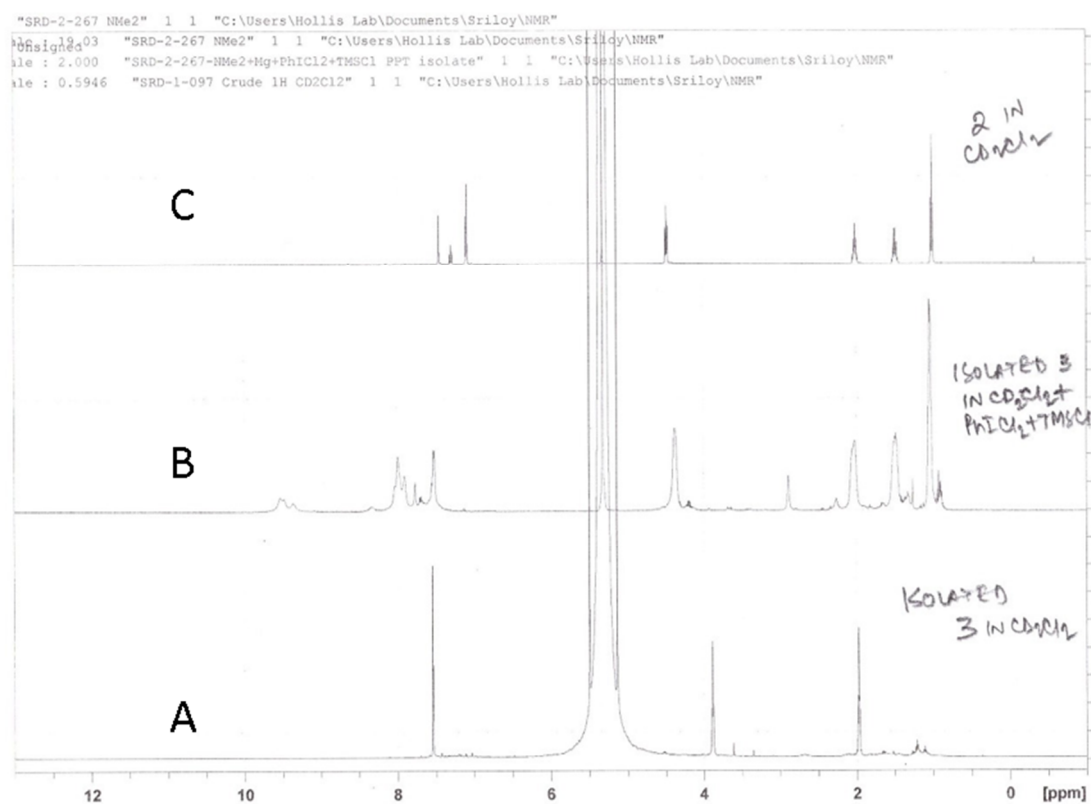

**Figure S1.** Stacked plot of the  $^1\text{H}$  NMR spectra for reoxidation of intermediate 3. A:  $^1\text{H}$  NMR spectrum of intermediate 3. B:  $^1\text{H}$  NMR spectrum of intermediate 3 after reoxidation. C:  $^1\text{H}$  NMR spectrum of 2 for reference.

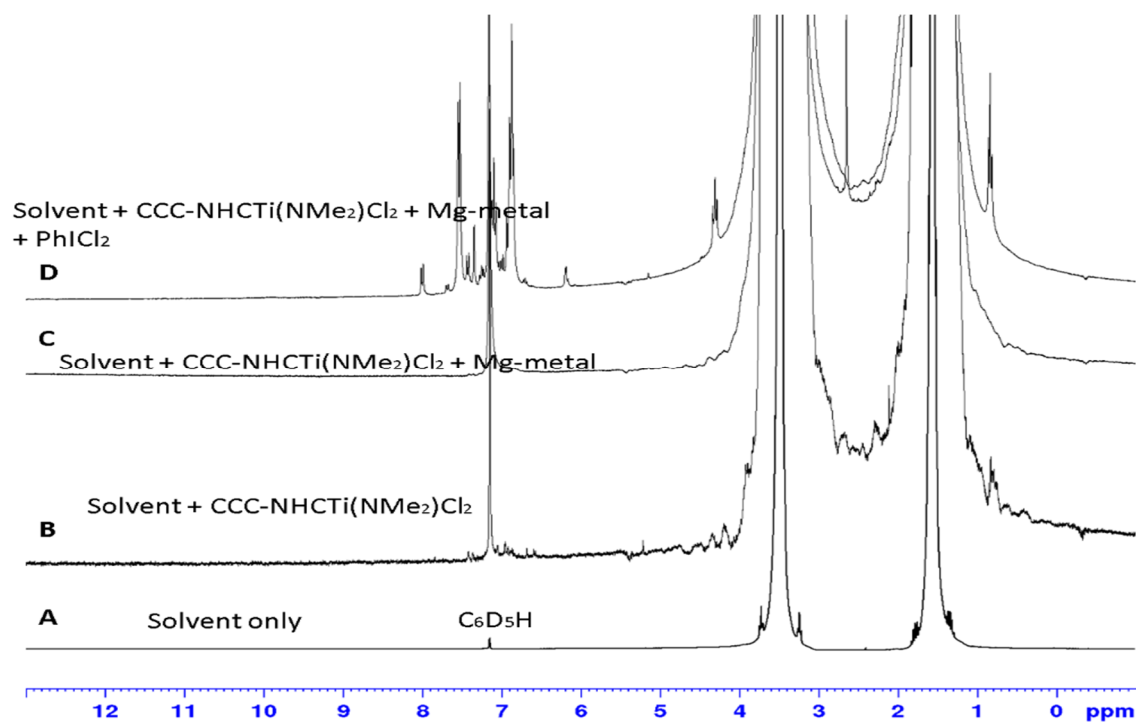

**Figure S2.** Stacked plot of the  $^1\text{H}$  NMR spectra for reduction of **1** with Mg-metal followed by reoxidation with  $\text{PhICl}_2$  in no-D THF. A:  $^1\text{H}$  NMR spectrum for no-D THF (locked with  $\text{C}_6\text{D}_6$ ). B:  $^1\text{H}$  NMR spectrum for **1**. C:  $^1\text{H}$  NMR spectrum after reduction of **1** to intermediate **3**. D:  $^1\text{H}$  NMR spectrum after reoxidation of intermediate **3** with  $\text{PhICl}_2$ .

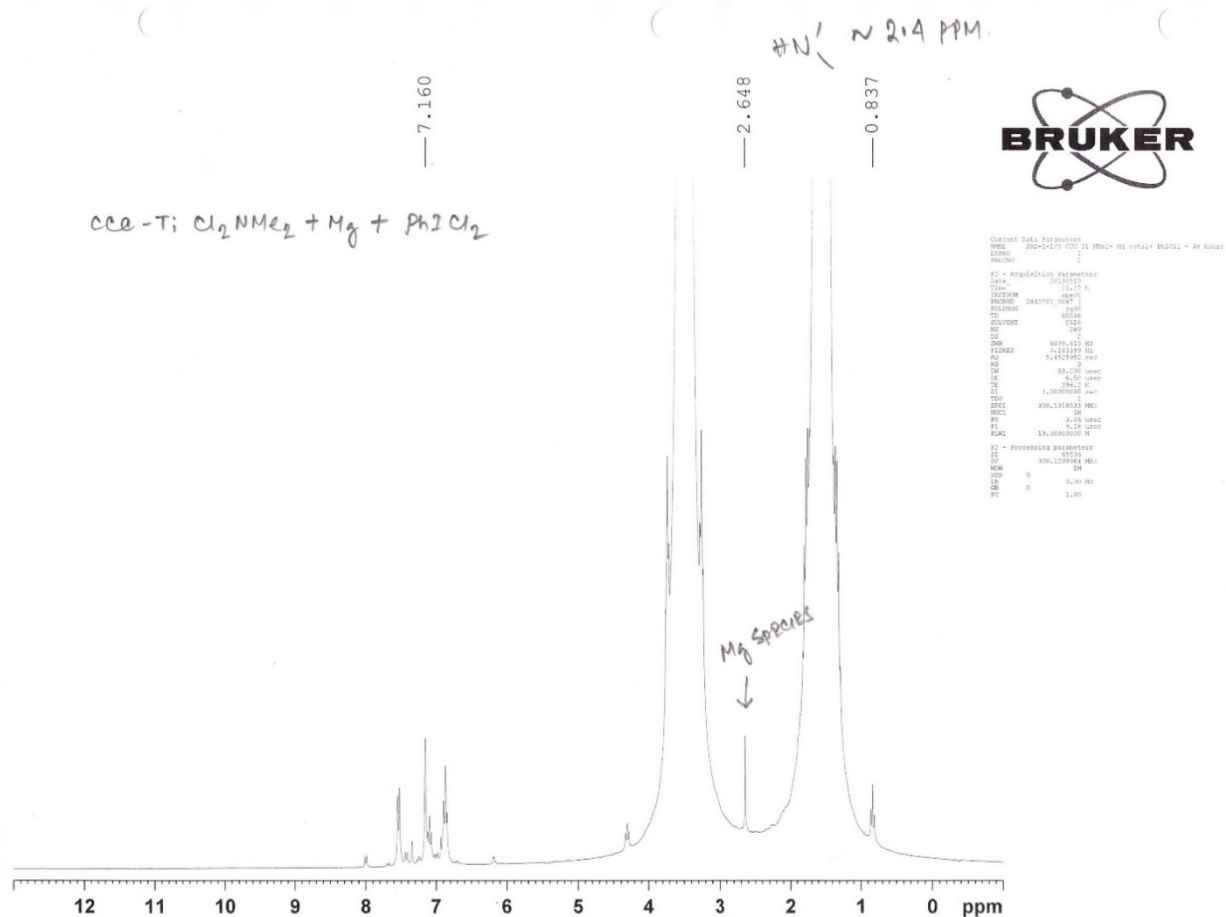

**Figure S3.**  $^1\text{H}$  NMR spectrum after reoxidation of intermediate **3** with  $\text{PhICl}_2$ .

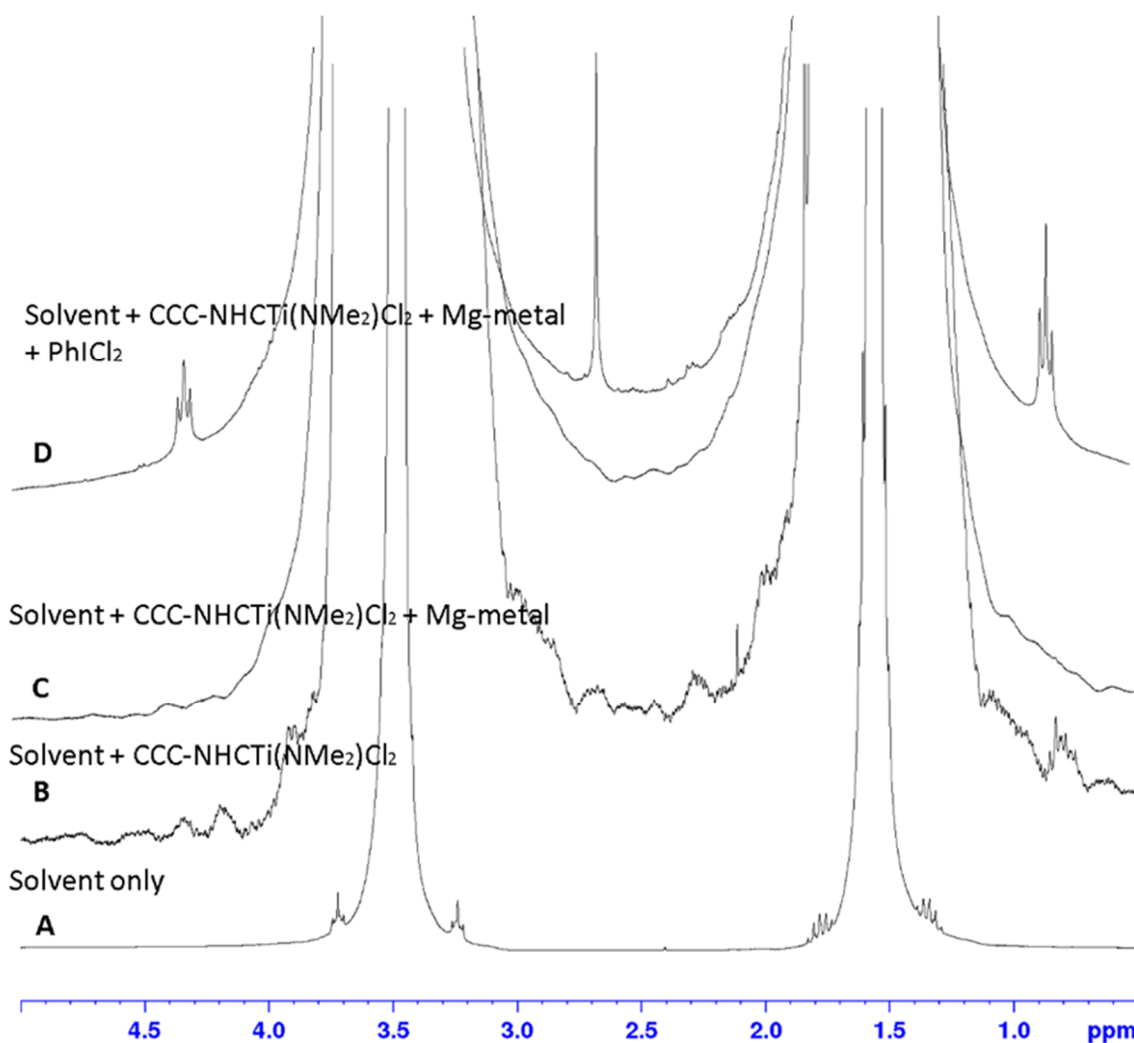

**Figure S4.** Stacked plot of the relevant zoomed portions of  $^1\text{H}$  NMR spectra for reduction of **1** with Mg-metal followed by reoxidation with  $\text{PhICl}_2$  in no-D THF. A:  $^1\text{H}$  NMR spectrum for no-D THF (locked with  $\text{C}_6\text{D}_6$ ). B:  $^1\text{H}$  NMR spectrum for **1**. C:  $^1\text{H}$  NMR spectrum after reduction of **1** to intermediate **3**. D:  $^1\text{H}$  NMR spectrum after reoxidation of intermediate **3** with  $\text{PhICl}_2$ .

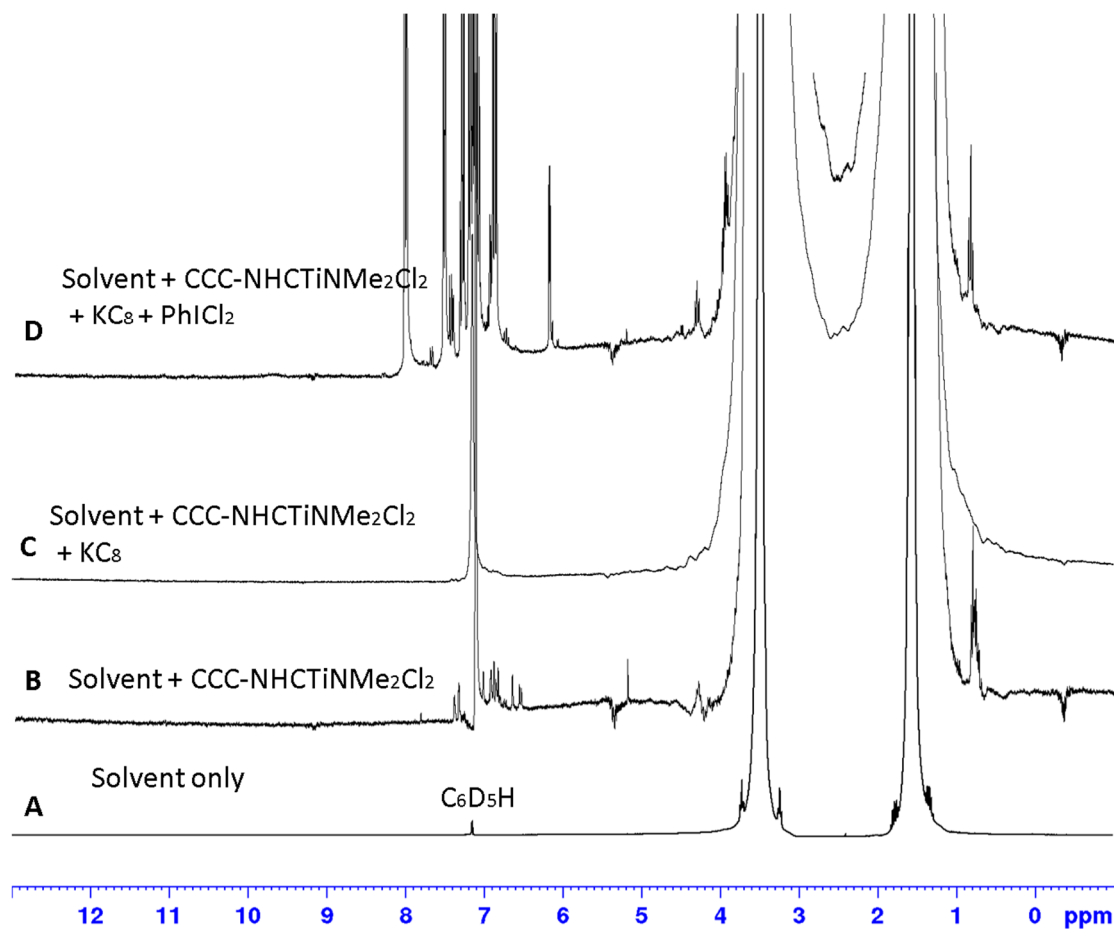

**Figure S5.** Stacked plot of the  $^1\text{H}$  NMR spectra for reduction of **1** with  $\text{K}_2\text{C}_8$  followed by reoxidation with  $\text{PhICl}_2$  in no-D THF. A:  $^1\text{H}$  NMR spectrum for no-D THF (locked with  $\text{C}_6\text{D}_6$ ). B:  $^1\text{H}$  NMR spectrum for **1**. C:  $^1\text{H}$  NMR spectrum after reduction of **1** to intermediate **3**. D:  $^1\text{H}$  NMR spectrum after reoxidation of intermediate **3** with  $\text{PhICl}_2$ .

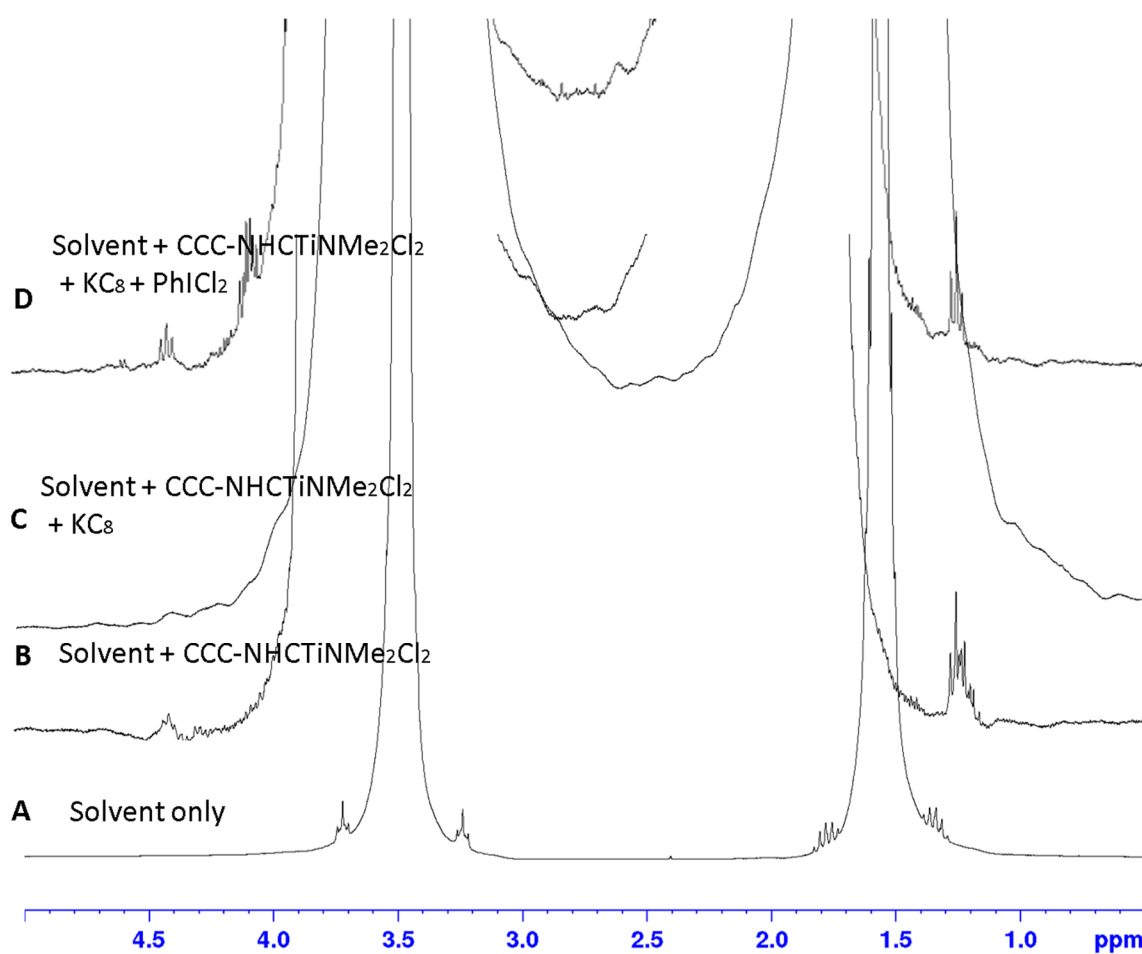

**Figure S6.** Stacked plot of the relevant zoomed portions of  $^1\text{H}$  NMR spectra for reduction of **1** with K<sup>+</sup>C<sub>8</sub> followed by reoxidation with PhICl<sub>2</sub> in no-D THF. A:  $^1\text{H}$  NMR spectrum for no-D THF (locked with  $\text{C}_6\text{D}_6$ ). B:  $^1\text{H}$  NMR spectrum for **1**. C:  $^1\text{H}$  NMR spectrum after reduction of **1** to intermediate **3**. D:  $^1\text{H}$  NMR spectrum after reoxidation of intermediate **3** with PhICl<sub>2</sub>.

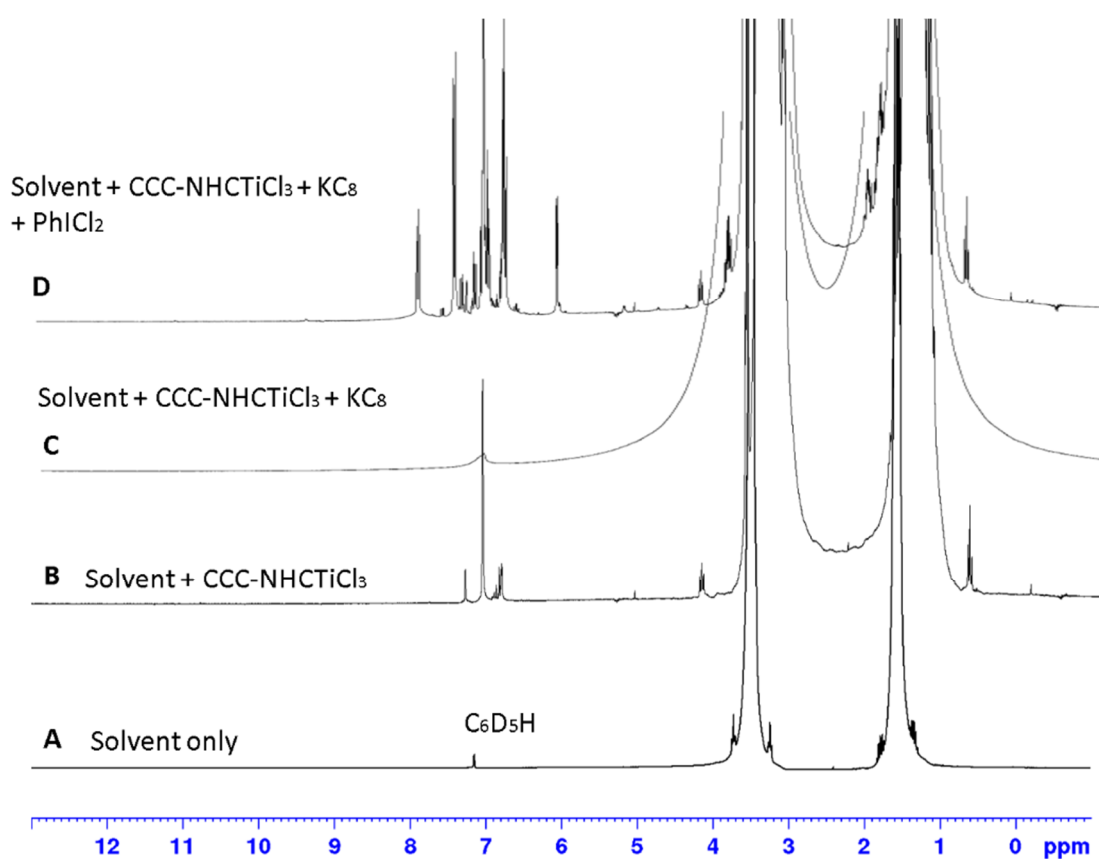

**Figure S7.** Stacked plot of the  $^1\text{H}$  NMR spectra for reduction of **2** with KC<sub>8</sub> followed by reoxidation with PhICl<sub>2</sub> in no-D THF. A:  $^1\text{H}$  NMR spectrum for no-D THF (locked with C<sub>6</sub>D<sub>6</sub>). B:  $^1\text{H}$  NMR spectrum for **2**. C:  $^1\text{H}$  NMR spectrum after reduction of **2** to intermediate **3'**. D:  $^1\text{H}$  NMR spectrum after reoxidation of intermediate **3'** with PhICl<sub>2</sub>.

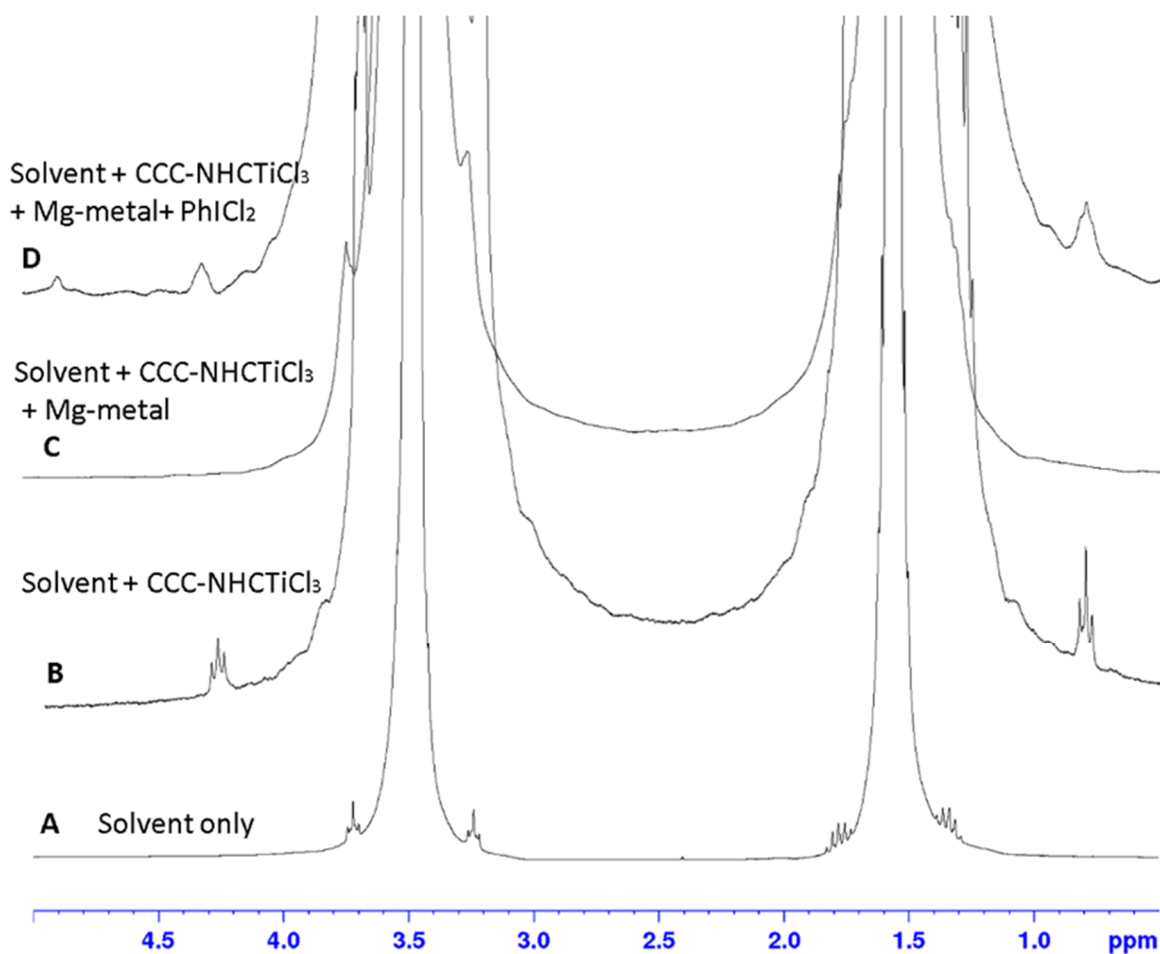

**Figure S8.** Stacked plot of the relevant zoomed portions of  $^1\text{H}$  NMR spectra for reduction of **2** with  $\text{KC}_8$  followed by reoxidation with  $\text{PhICl}_2$  in no-D THF. A:  $^1\text{H}$  NMR spectrum for no-D THF (locked with  $\text{C}_6\text{D}_6$ ). B:  $^1\text{H}$  NMR spectrum for **2**. C:  $^1\text{H}$  NMR spectrum after reduction of **2** to intermediate **3'**. D:  $^1\text{H}$  NMR spectrum after reoxidation of intermediate **3'** with  $\text{PhICl}_2$ .

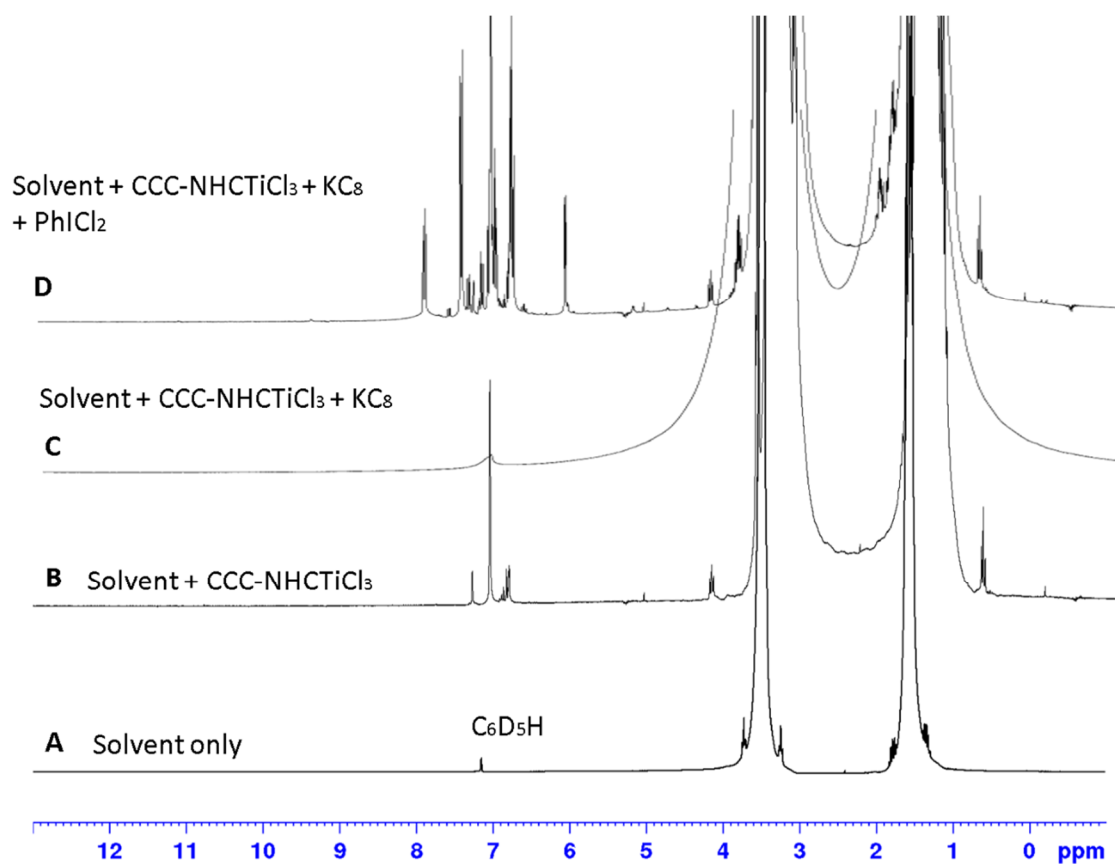

**Figure S9.** Stacked plot of the  $^1\text{H}$  NMR spectra for reduction of **2** with Mg-metal followed by reoxidation with  $\text{PhICl}_2$  in no-D THF. A:  $^1\text{H}$  NMR spectrum for no-D THF (locked with  $\text{C}_6\text{D}_6$ ). B:  $^1\text{H}$  NMR spectrum for **2**. C:  $^1\text{H}$  NMR spectrum after reduction of **2** to intermediate **3'**. D:  $^1\text{H}$  NMR spectrum after reoxidation of intermediate **3'** with  $\text{PhICl}_2$ .

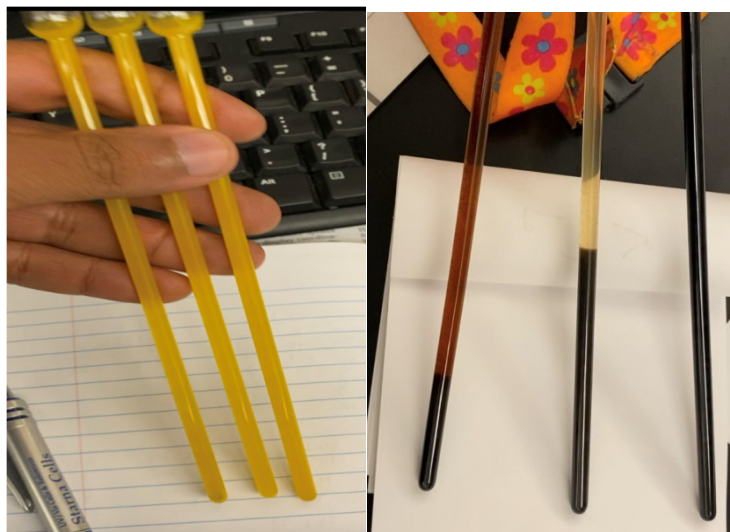

**Figure S10.** Pictures of NMR tubes from reduction of **2** with 1, 2 and 4 equivalents of  $KCs$  respectively.

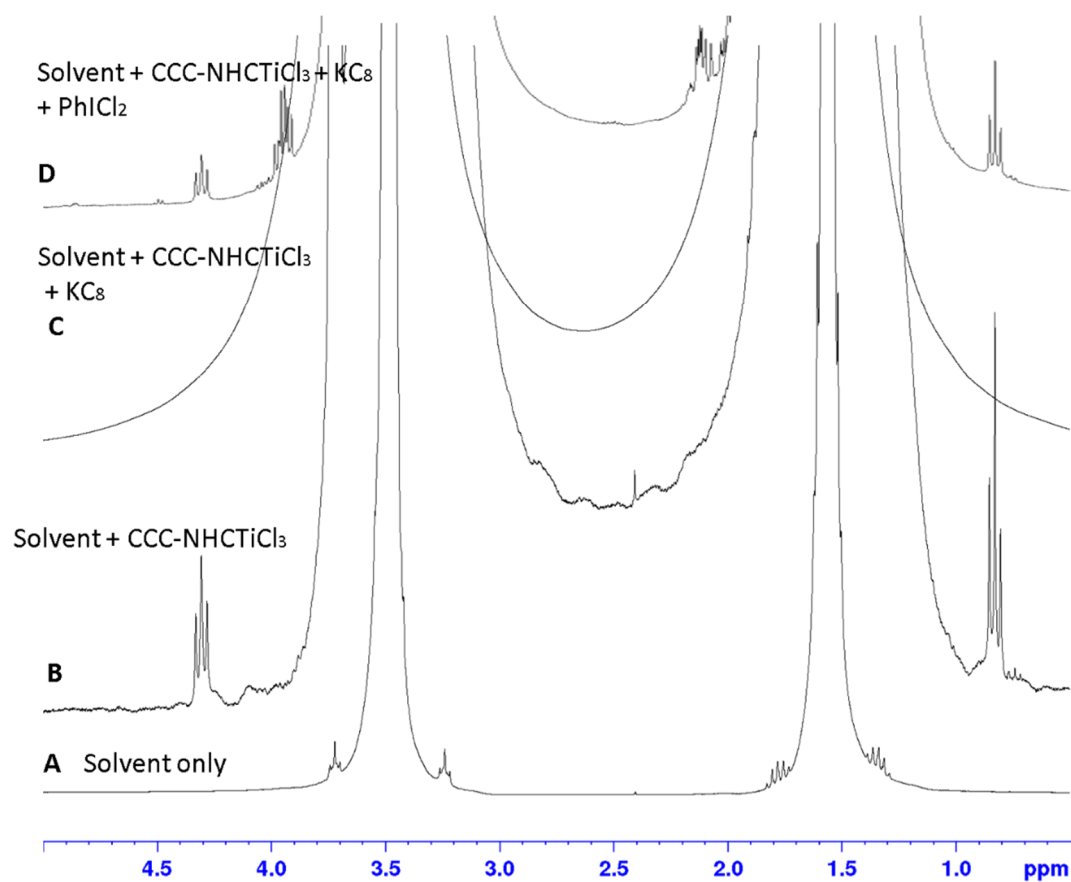

**Figure S11.** Stacked plot of the  $^1\text{H}$  NMR spectra for reduction of **2** with  $\text{KC}_8$  followed by reoxidation with  $\text{PhICl}_2$  in no-D THF. A:  $^1\text{H}$  NMR spectrum for no-D THF (locked with  $\text{C}_6\text{D}_6$ ). B:  $^1\text{H}$  NMR spectrum for **2**. C:  $^1\text{H}$  NMR spectrum after reduction of **2** to intermediate **3'**. D:  $^1\text{H}$  NMR spectrum after reoxidation of intermediate **3'** with  $\text{PhICl}_2$ .

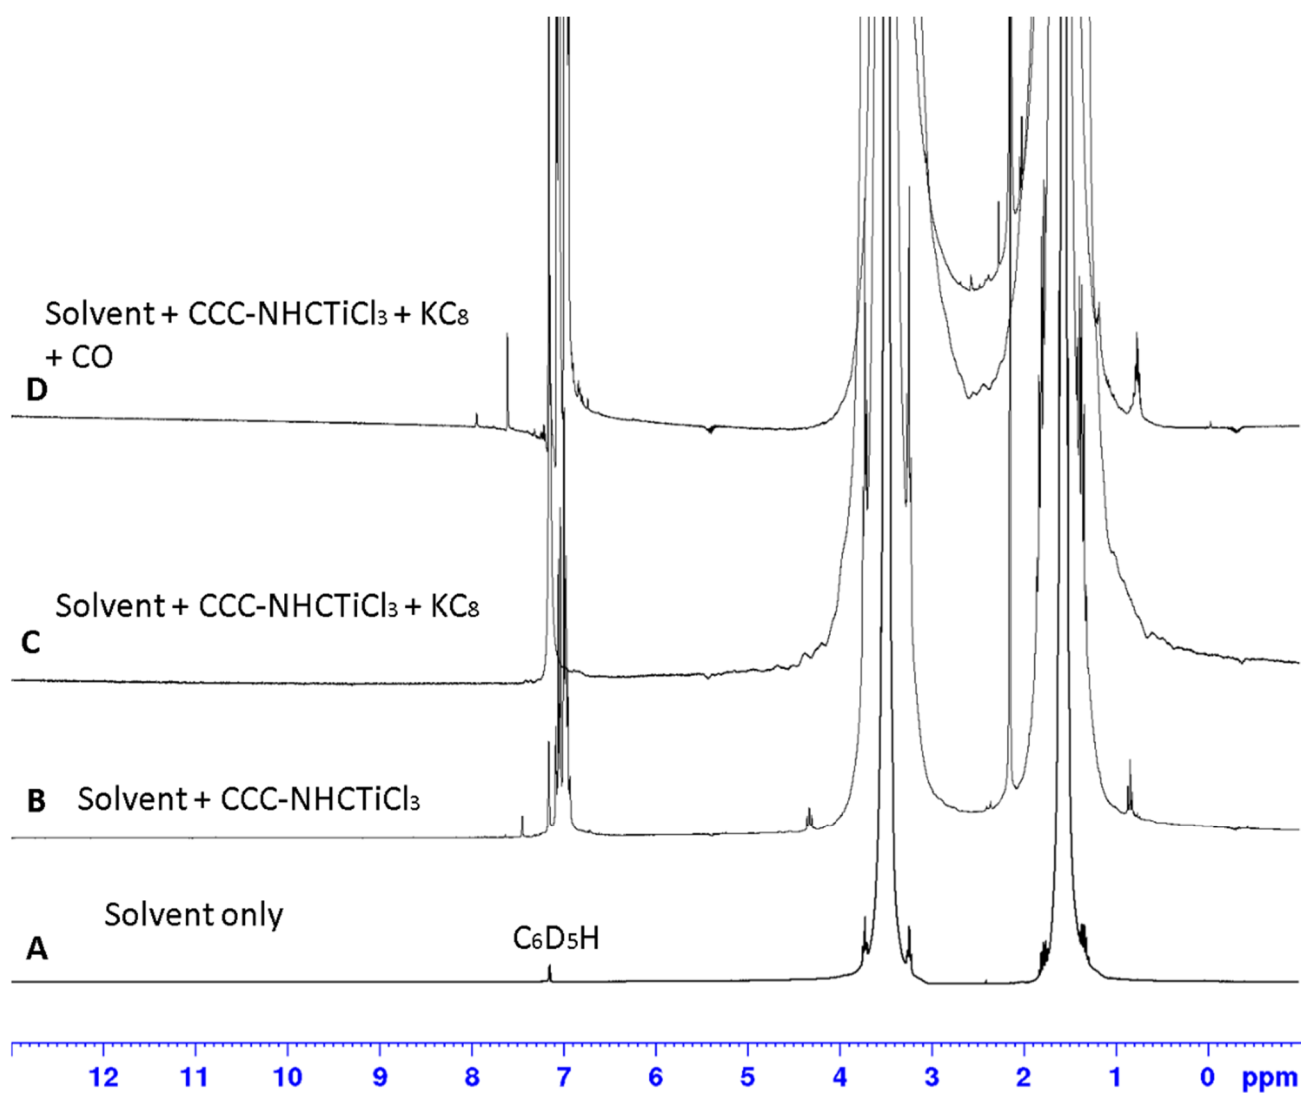

**Figure S12.** Stacked plot of the  $^1\text{H}$  NMR spectra for reduction of **2** with  $\text{KC}_8$  followed by bubbling with  $\text{CO}$  in  $\text{no-D THF}$ . A:  $^1\text{H}$  NMR spectrum for  $\text{no-D THF}$  (locked with  $\text{C}_6\text{D}_6$ ). B:  $^1\text{H}$  NMR spectrum for **2**. C:  $^1\text{H}$  NMR spectrum after reduction of **2** to intermediate **3'**. D:  $^1\text{H}$  NMR spectrum after **3'** was bubbled with  $\text{CO}$ .

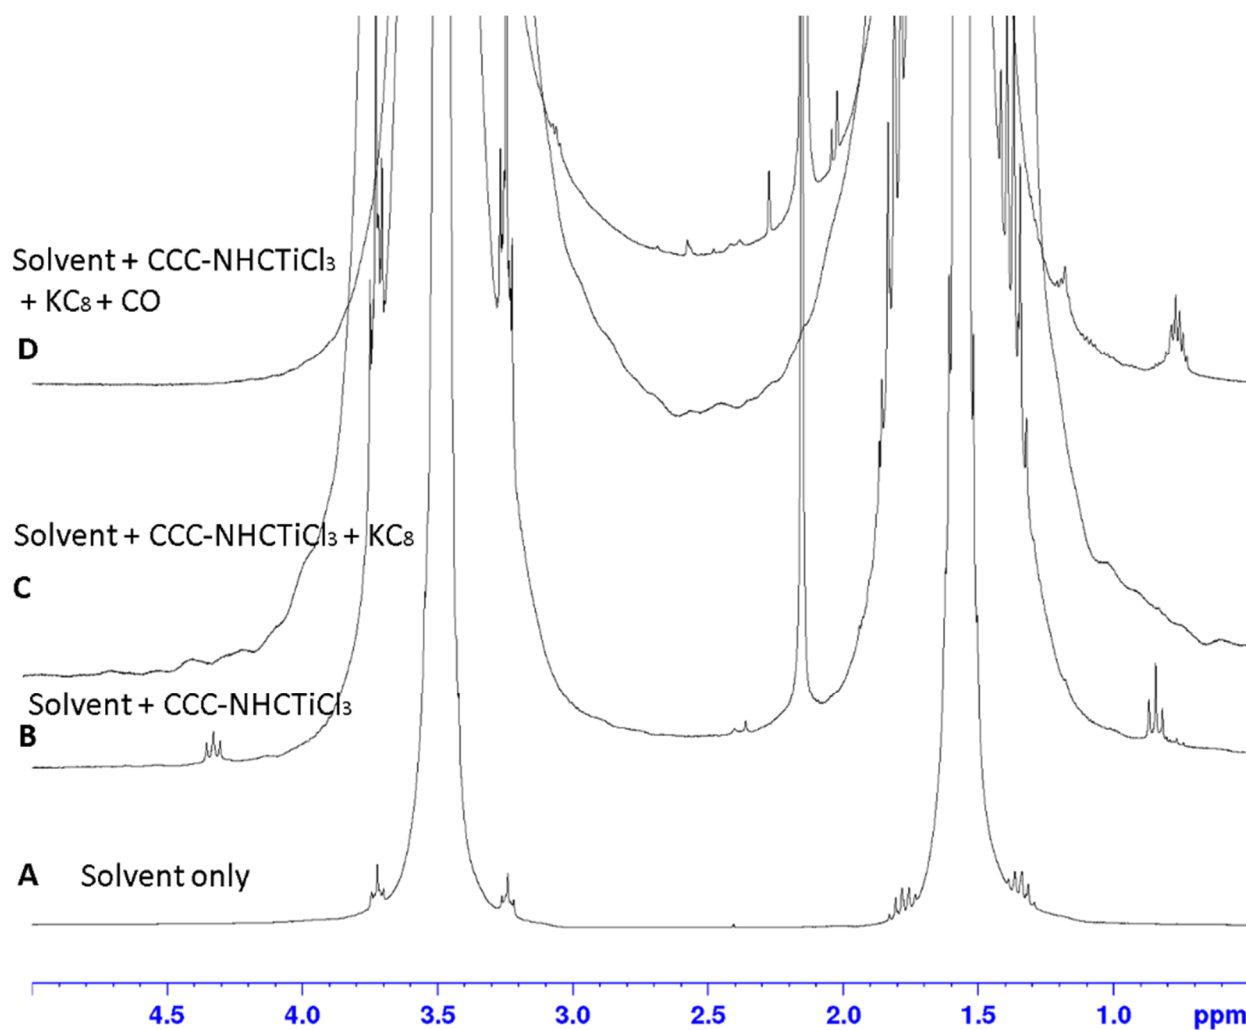

**Figure S13.** Stacked plot of the relevant zoomed portions of  $^1\text{H}$  NMR spectra for reduction of **2** with KC<sub>8</sub> followed by bubbling with CO in no-D THF. A:  $^1\text{H}$  NMR spectrum for no-D THF (locked with C<sub>6</sub>D<sub>6</sub>). B:  $^1\text{H}$  NMR spectrum for **2**. C:  $^1\text{H}$  NMR spectrum after reduction of **2** to intermediate **3'**. D:  $^1\text{H}$  NMR spectrum after **3'** was bubbled with CO.
